# Supplementary material for: c-Kit Induces Migration of Triple-Negative Breast Cancer Cells and Is a Promising Target for Tyrosine Kinase Inhibitor Treatment
Source: MDPI journal article supplement (doi:10.3390/ijms23158702), 2022-08-05
Supplement: s1 [file s1]

## c-Kit

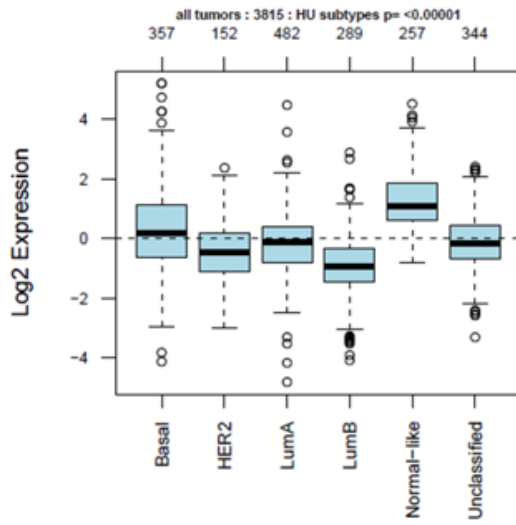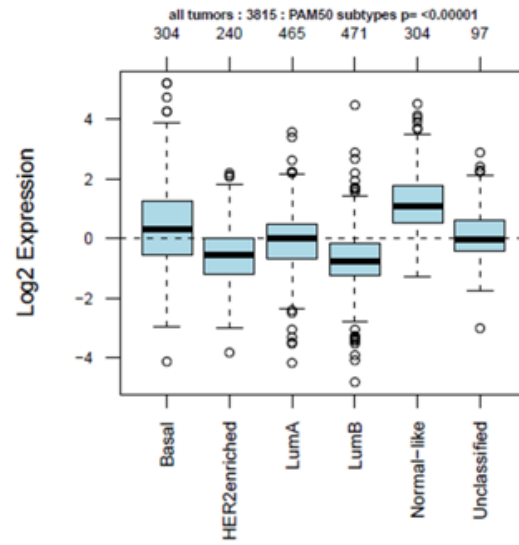

## YES

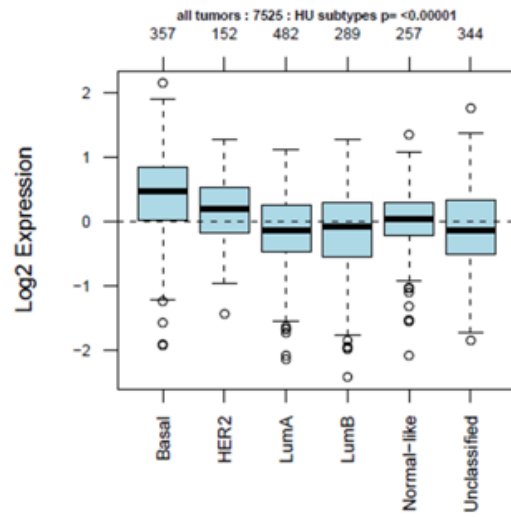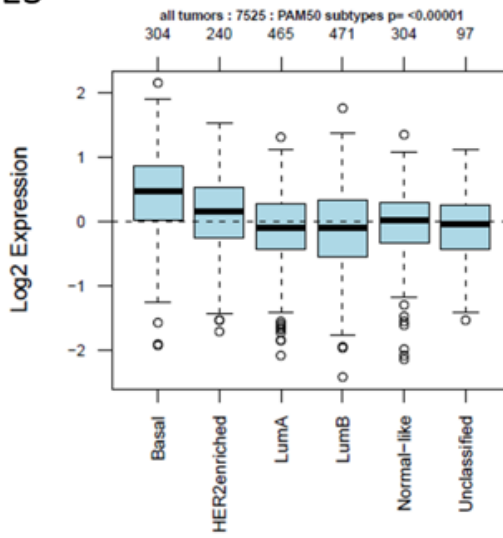

## FYN

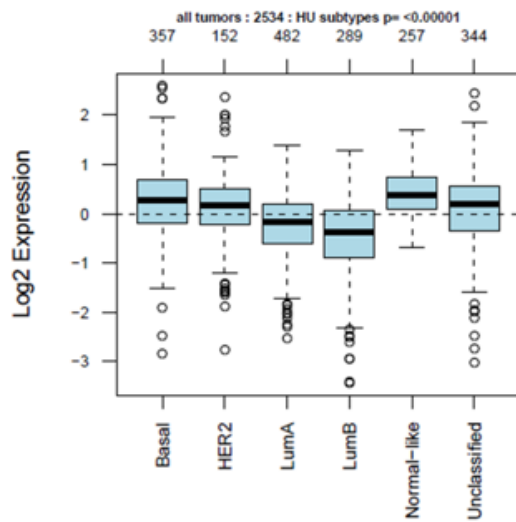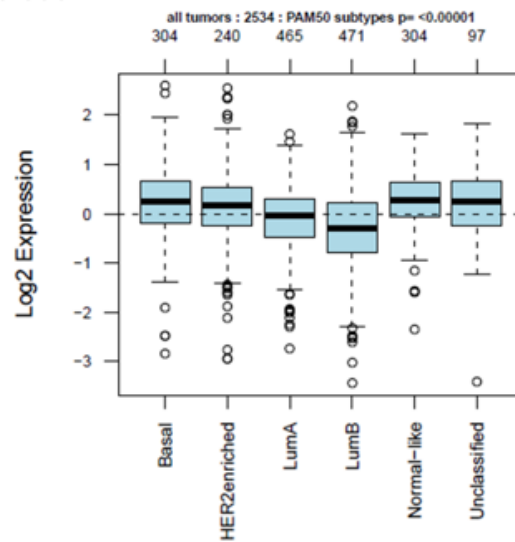

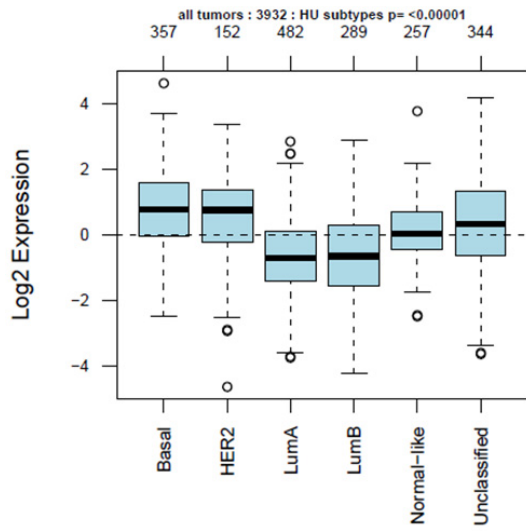

LCK

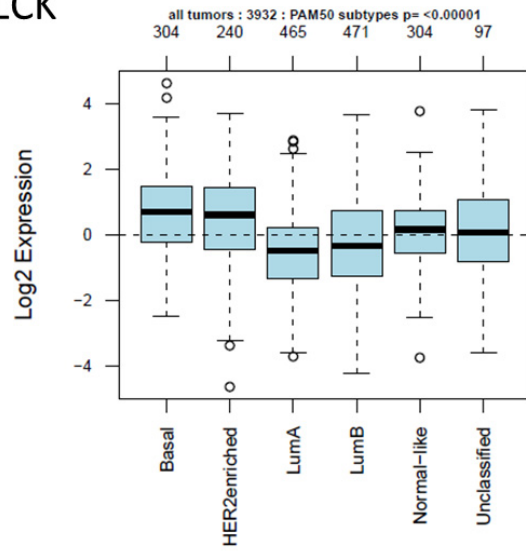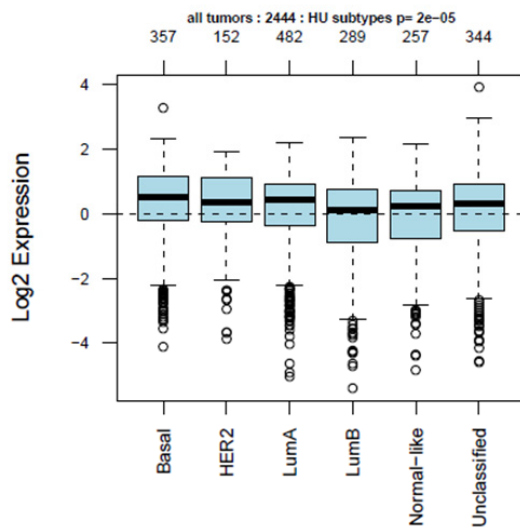

FRK

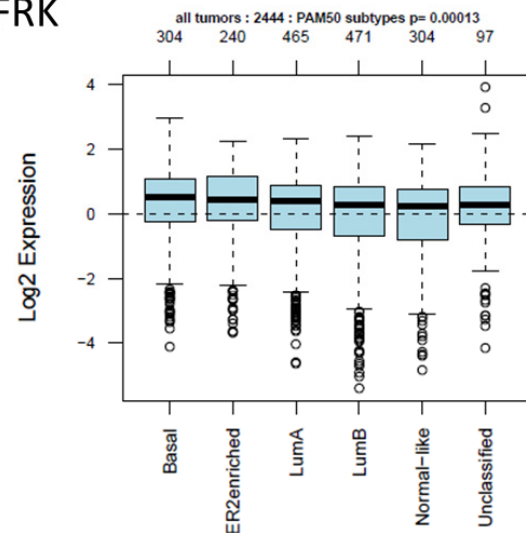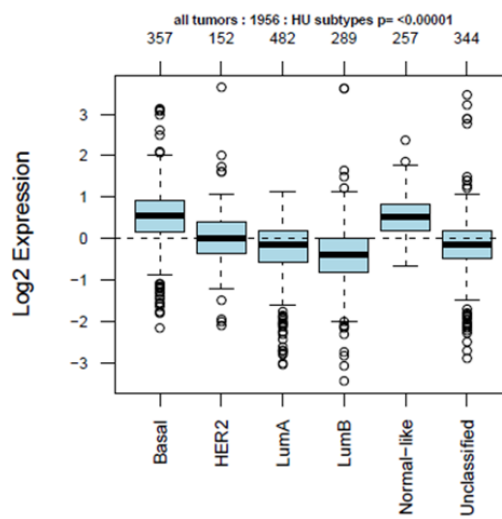

EGFR

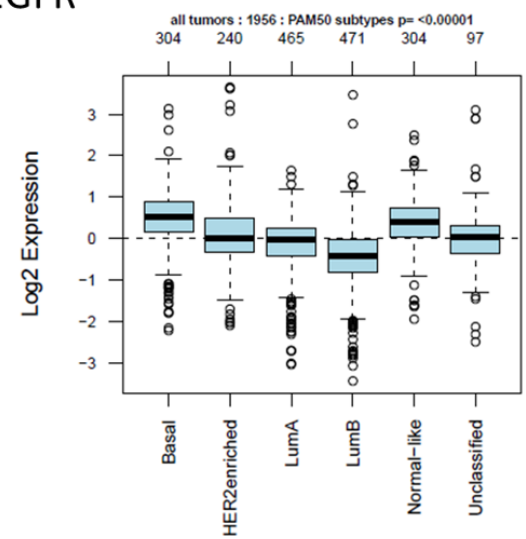

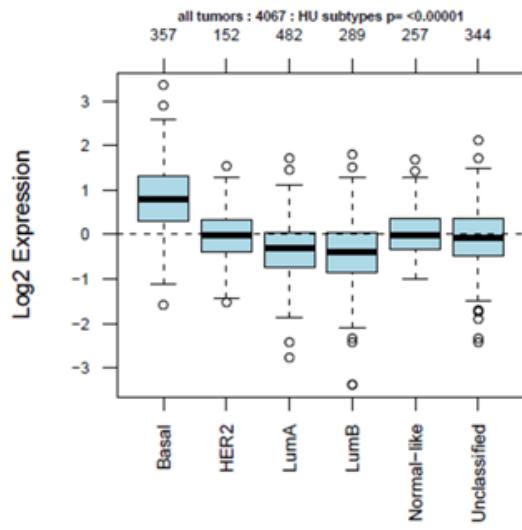

LYN

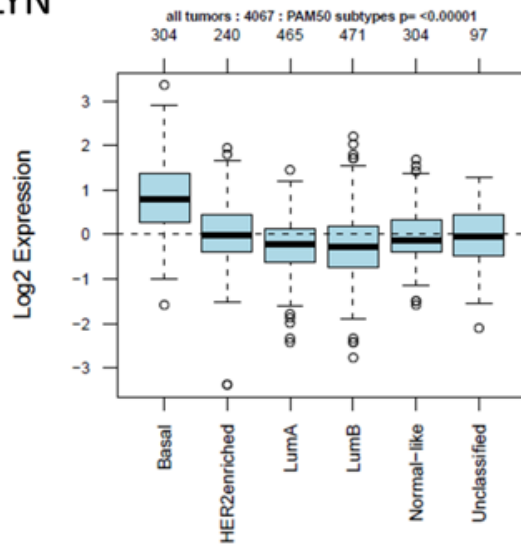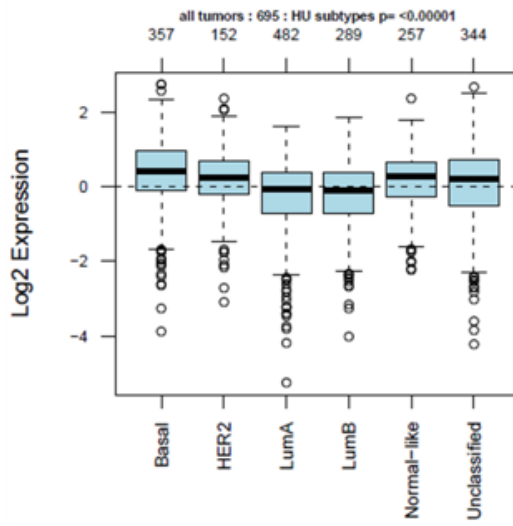

BTK

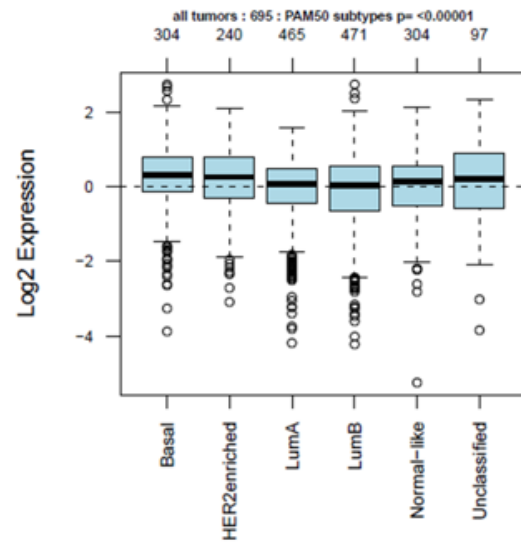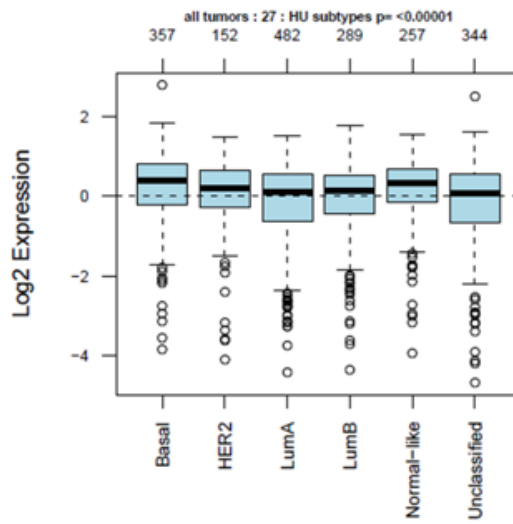

ABL2

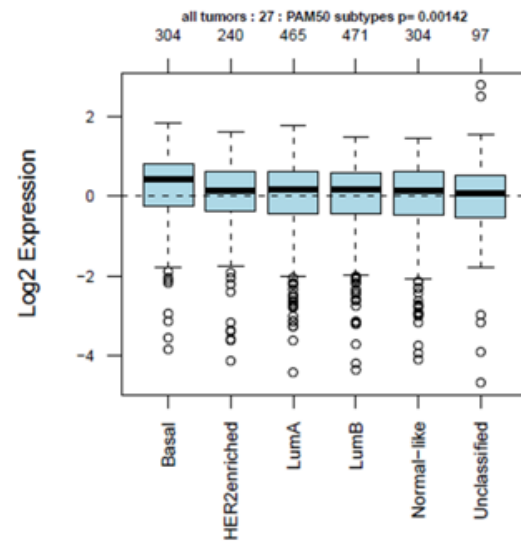

**Figure S3. Expression of Receptor Tyrosine Kinases (RTKs) and intracellular tyrosine kinases in Breast Cancer.** Expression of RTKs and intracellular tyrosine kinases targeted by Imatinib, Dasatinib, Sorafenib, Sunitinib, Nilotinib, and Lapatinib was explored using data from the Gene expression-based Outcome for Breast cancer Online (GOBO) tool. Differential expression of RTKs and intracellular tyrosine kinases among the basal, HER2-enriched, normal-like, and unclassified subgroups is shown. RTKs and intracellular tyrosine kinases showing significantly higher levels of expression in the basal subtype (LCK, YES, FYN, FRK, LYN, BTK, ABL, and c-Kit) were selected for further analysis.
