# Supplementary material for: c-Kit Induces Migration of Triple-Negative Breast Cancer Cells and Is a Promising Target for Tyrosine Kinase Inhibitor Treatment
Source: MDPI journal article supplement (doi:10.3390/ijms23158702), 2022-08-05
Supplement: s1 [file s1]

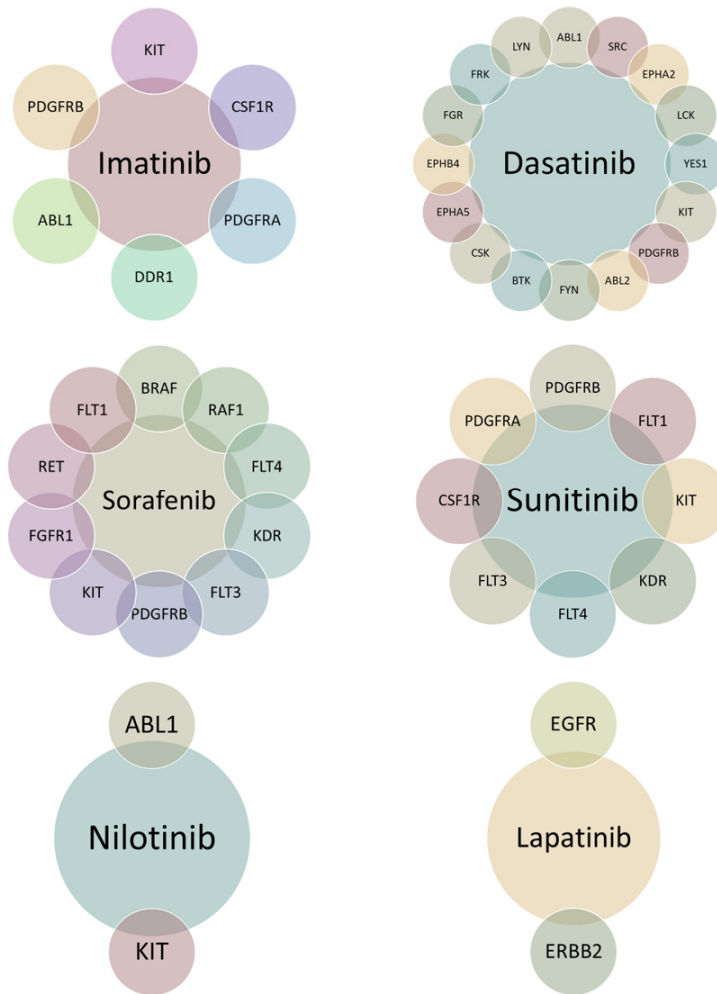

**Figure S2. Tyrosine Kinases targeted by selected Tyrosine Kinase Inhibitors.** Targeted RTKs and intracellular Tyrosine Kinases for Imatinib, Dasatinib, Sorafenib, Sunitinib, Nilotinib, and Lapatinib are shown.
