# Supplementary material for: c-Kit Induces Migration of Triple-Negative Breast Cancer Cells and Is a Promising Target for Tyrosine Kinase Inhibitor Treatment
Source: MDPI journal article supplement (doi:10.3390/ijms23158702), 2022-08-05
Supplement: s1 [file s1]

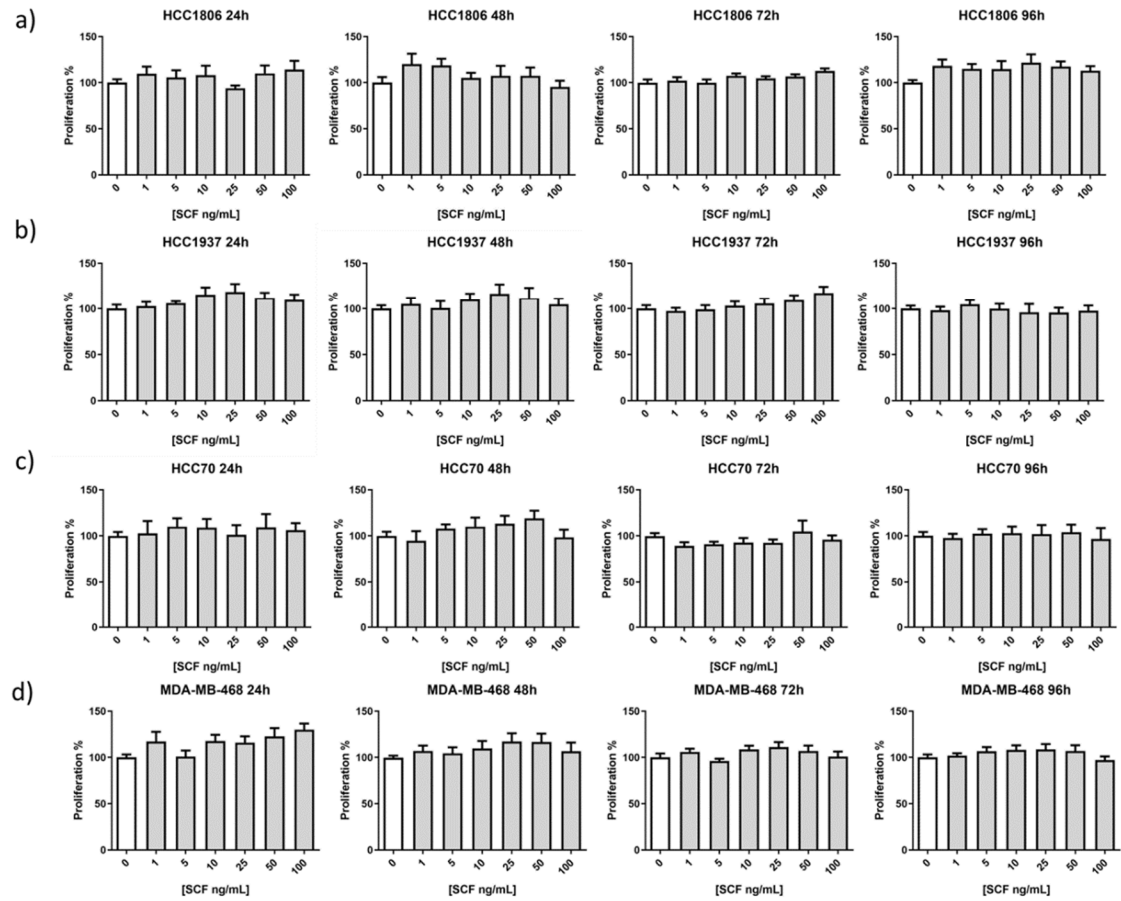

**Figure S1. Effect of c-Kit activation on TNBC cell proliferation.** HCC-1806 (a), HCC-1937 (b), HCC-70 (c) and MDA-MB-468 (d) cells were incubated with increasing concentrations of SCF as indicated. Cell proliferation was evaluated at 24, 48, 72 and 96 h using the MTT colorimetric assay. Values represent the average of three independent experiments. Error bars indicate the standard error of the mean.
